# Supplementary material for: FASN promotes lymph node metastasis in cervical cancer via cholesterol reprogramming and lymphangiogenesis
Source: PubMed Central journal article supplement (PMC9124199; doi:10.1038/s41419-022-04926-2), 2022-05-21
Supplement: 41419_2022_4926_MOESM1_ESM.pdf [file 41419_2022_4926_MOESM1_ESM.pdf]

**FASN promotes lymph node metastasis in cervical cancer via cholesterol reprogramming  
and lymphangiogenesis**

Qiqiao Du <sup>1</sup>, Pan Liu <sup>1,4</sup>, Chunyu Zhang<sup>1</sup>, Tianyu Liu <sup>1</sup>, Wei Wang <sup>1</sup>, Chunliang Shang<sup>2</sup>, Jieyu Wu  
<sup>3</sup>, Yuandong Liao <sup>1</sup>, Yili Chen <sup>1</sup>, Jiaming Huang <sup>1</sup>, Hao Tan <sup>1</sup>, Yunhe Zhao <sup>1</sup>, Meng Xia <sup>1</sup>, Junxiu  
Liu <sup>1\*</sup> and Shuzhong Yao <sup>1\*</sup>

<sup>1</sup> Department of Obstetrics and Gynecology, The First Affiliated Hospital of Sun Yat-sen  
University, Guangzhou, P.R. China

<sup>2</sup> Department of Obstetrics and Gynecology, Peking University Third Hospital, Beijing, P.R.  
China

<sup>3</sup> Department of Microbiology, Tumor and Cell Biology, Karolinska Institute, 171 77 Stockholm,  
Sweden

<sup>4</sup> Department of Obstetrics and Gynecology, Union Hospital, Tongji Medical College, Huazhong  
University of Science and Technology, Wuhan, 430022, China.

**\*Correspondence:** Junxiu Liu [liujxiu@mail.sysu.edu.cn](mailto:liujxiu@mail.sysu.edu.cn); Shuzhong Yao  
[yaoshuzh@mail.sysu.edu.cn](mailto:yaoshuzh@mail.sysu.edu.cn)

**Running title:** FASN in cervical cancer nodal metastasis

## Supplementary Material

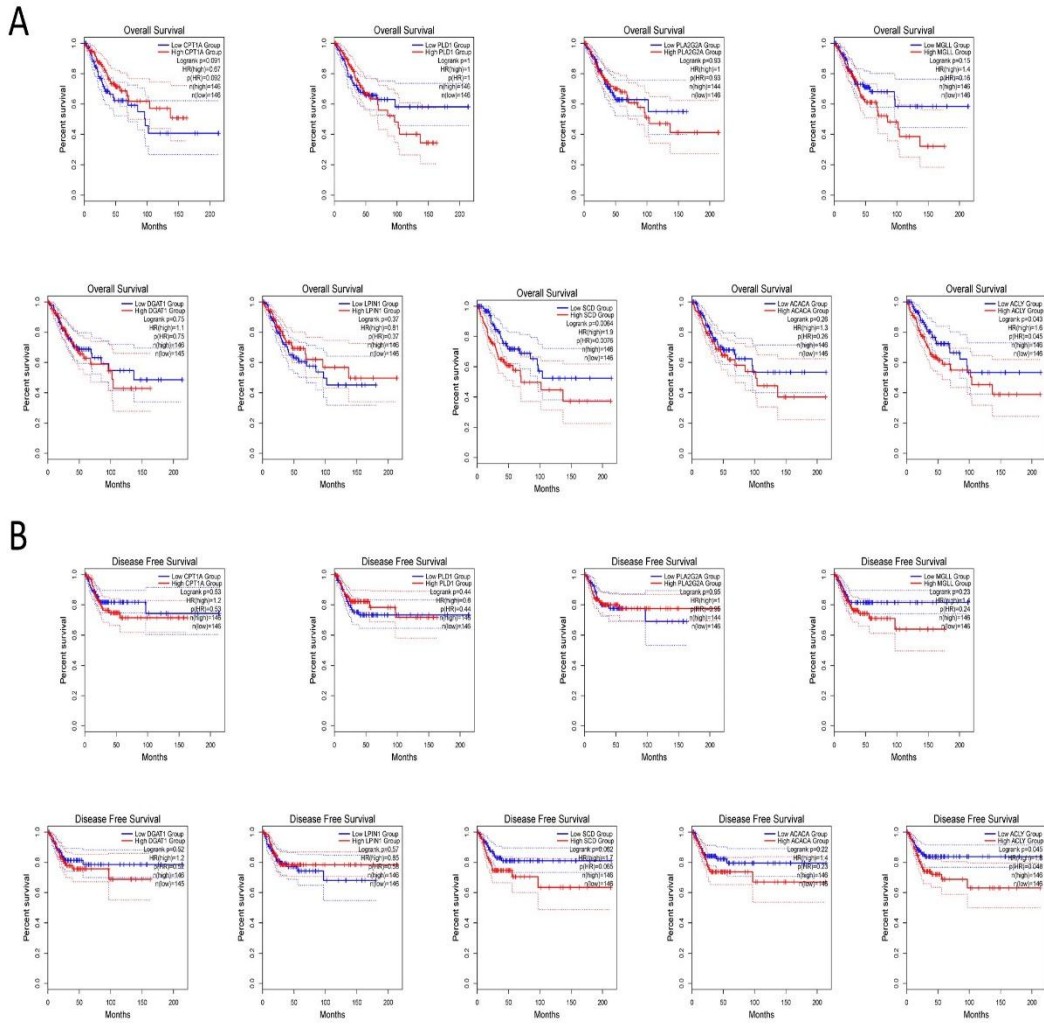

**Fig S1. Overall and disease-free survival analysis of lipid metabolism related genes involved in cancer metastasis using TCGA dataset. A. Overall survival analysis of 9 lipid metabolism related genes involved in cancer metastasis using TCGA dataset. B. Disease-free survival analysis of 9 lipid metabolism related genes involved in cancer metastasis using TCGA dataset.**

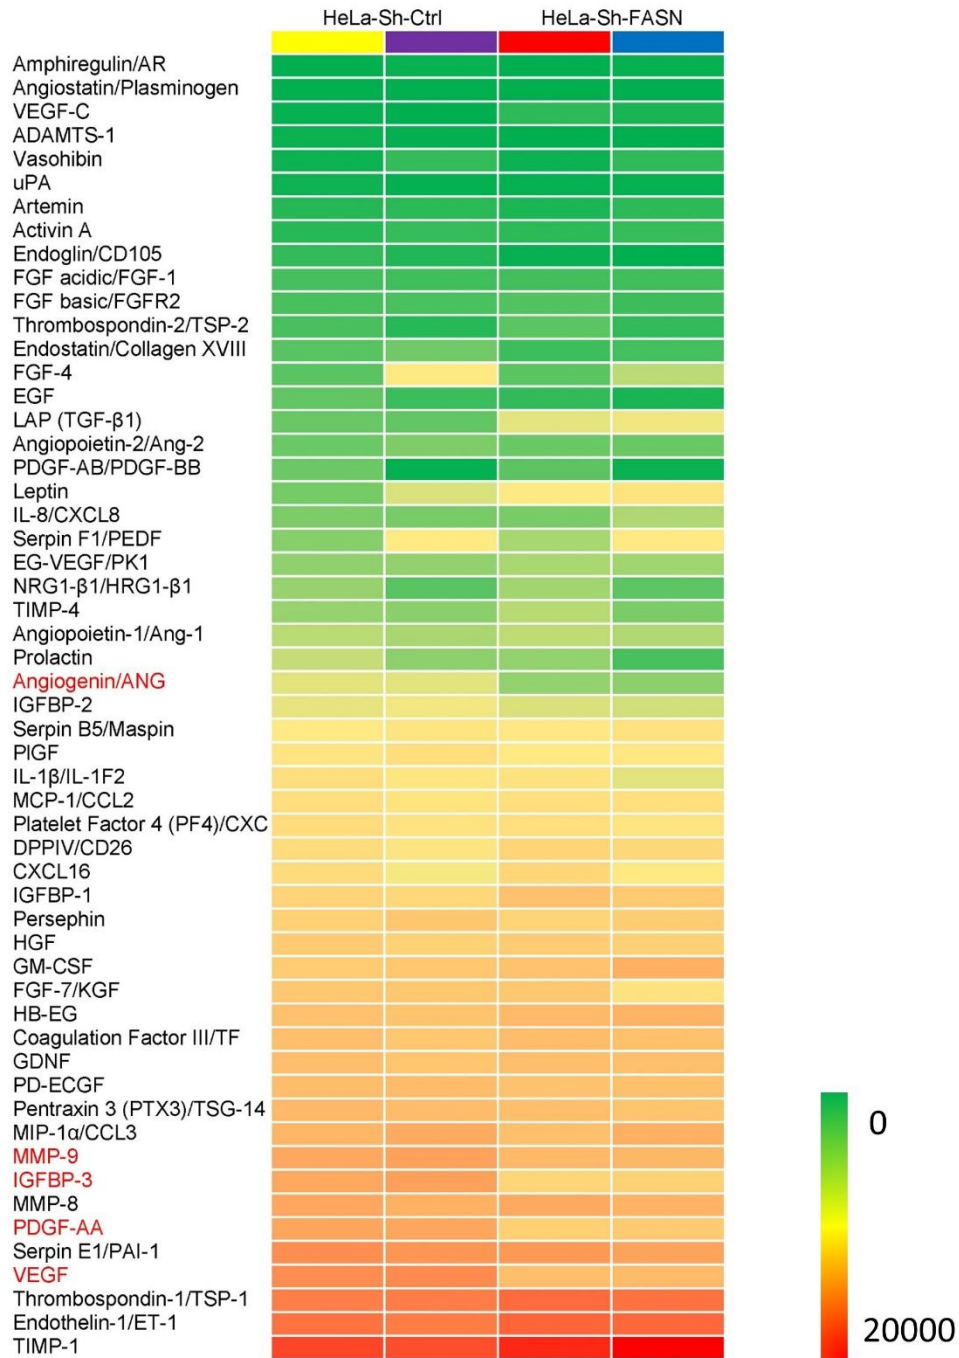

**Fig S2. Heatmap of angiogenesis related factors in HeLa cell culture supernatant.** The pixels were analyzed and form the heatmap. The red marked the most differentiated ones

| Clinicopathologic Variable           | Total(N=142) | FASN           |                 | P value      |
|--------------------------------------|--------------|----------------|-----------------|--------------|
|                                      |              | Low expression | High expression |              |
| <b>Age/years</b>                     |              |                |                 |              |
| <=42                                 | 55           | 36             | 19              |              |
| >42                                  | 87           | 49             | 38              | 0.283        |
| <b>FIGO stage</b>                    |              |                |                 |              |
| Ia2                                  | 8            | 4              | 4               |              |
| Ib1                                  | 99           | 63             | 36              |              |
| Ib2                                  | 10           | 5              | 5               |              |
| IIa1                                 | 16           | 6              | 10              |              |
| IIa2                                 | 9            | 7              | 2               | 0.527        |
| <b>Tumor size</b>                    |              |                |                 |              |
| <=4                                  | 114          | 69             | 45              |              |
| >4                                   | 28           | 16             | 12              | 0.746        |
| <b>Pathologic types</b>              |              |                |                 |              |
| Squamous cell carcinoma              | 113          | 65             | 48              |              |
| Adenocarcinoma                       | 20           | 14             | 6               |              |
| Adenosquamous carcinoma              | 9            | 6              | 3               | 0.276        |
| <b>Stromal invasion</b>              |              |                |                 |              |
| <1/2                                 | 55           | 27             | 28              |              |
| ≥1/2                                 | 87           | 58             | 29              | <b>0.038</b> |
| <b>Lymphovascular space invasion</b> |              |                |                 |              |
| Yes                                  | 16           | 8              | 8               |              |
| No                                   | 126          | 77             | 49              | 0.397        |
| <b>Differentiation grade</b>         |              |                |                 |              |
| Well                                 | 11           | 6              | 5               |              |
| Moderate                             | 51           | 27             | 24              |              |
| Poor                                 | 80           | 52             | 28              | 0.175        |
| <b>Pelvic lymph node metastasis</b>  |              |                |                 |              |
| Yes                                  | 29           | 12             | 17              |              |
| No                                   | 113          | 73             | 40              | <b>0.023</b> |
| <b>Vaginal involvement</b>           |              |                |                 |              |
| Yes                                  | 3            | 3              | 0               |              |
| No                                   | 139          | 82             | 57              | 0.154        |
| <b>Parametrial infiltration</b>      |              |                |                 |              |
| Yes                                  | 2            | 2              | 0               |              |
| No                                   | 140          | 83             | 57              | 0.247        |
| <b>Recurrence</b>                    |              |                |                 |              |
| Yes                                  | 13           | 0              | 13              |              |
| No                                   | 129          | 85             | 44              | <0.001       |
| <b>Vital status at follow-up</b>     |              |                |                 |              |
| Alive                                | 123          | 84             | 39              |              |
| Dead                                 | 19           | 1              | 18              | <0.001       |

Abbreviations: FIGO: the International Federation of Gynecology and Obstetrics;

The bold number inside the table reflected  $P < 0.05$

**TableS1. Correlation between FASN expression and clinicopathological characteristics of patients with cervical cancer.**

| Clinicopathologic Variable           | Total(N=142) | OS                    |                    |              | DFS                   |                    |              |
|--------------------------------------|--------------|-----------------------|--------------------|--------------|-----------------------|--------------------|--------------|
|                                      |              | Univariate<br>p value | Multivariate       |              | Univariate<br>p value | Multivariate       |              |
|                                      |              |                       | RR(95% CI)         | p value      |                       | RR(95% CI)         | p value      |
| <b>Age/years</b>                     |              |                       |                    |              |                       |                    |              |
| <=42                                 | 55           |                       |                    |              |                       |                    |              |
| >42                                  | 87           | 0.399                 | N                  | N            | 0.393                 | N                  | N            |
| <b>FIGO stage</b>                    |              |                       |                    |              |                       |                    |              |
| Ia2                                  | 8            |                       |                    |              |                       |                    |              |
| Ib1                                  | 99           |                       |                    |              |                       |                    |              |
| Ib2                                  | 10           |                       |                    |              |                       |                    |              |
| IIa1                                 | 16           |                       |                    |              |                       |                    |              |
| IIa2                                 | 9            | 0.630                 | N                  | N            | 0.631                 | N                  | N            |
| <b>Tumor size</b>                    |              |                       |                    |              |                       |                    |              |
| <=4                                  | 114          |                       |                    |              |                       |                    |              |
| >4                                   | 28           | 0.262                 | N                  | N            | 0.268                 | N                  | N            |
| <b>Pathologic types</b>              |              |                       |                    |              |                       |                    |              |
| Squamous cell carcinoma              | 113          |                       |                    |              |                       |                    |              |
| Adenocarcinoma                       | 20           |                       |                    |              |                       |                    |              |
| Adenosquamous carcinoma              | 9            | 0.332                 | N                  | N            | 0.336                 | N                  | N            |
| <b>Stromal invasion</b>              |              |                       |                    |              |                       |                    |              |
| <1/2                                 | 55           |                       |                    |              |                       |                    |              |
| ≥1/2                                 | 87           | 0.443                 | N                  | N            | 0.437                 | N                  | N            |
| <b>Differentiation grade</b>         |              |                       |                    |              |                       |                    |              |
| Well                                 | 11           |                       |                    |              |                       |                    |              |
| Moderate                             | 51           |                       |                    |              |                       |                    |              |
| Poor                                 | 80           | 0.414                 | N                  | N            | 0.409                 | N                  | N            |
| <b>Vaginal involvement</b>           |              |                       |                    |              |                       |                    |              |
| Yes                                  | 3            |                       |                    |              |                       |                    |              |
| No                                   | 139          | 0.530                 | N                  | N            | 0.529                 | N                  | N            |
| <b>Parametrial infiltration</b>      |              |                       |                    |              |                       |                    |              |
| Yes                                  | 2            |                       |                    |              |                       |                    |              |
| No                                   | 140          | 0.610                 | N                  | N            | 0.609                 | N                  | N            |
| <b>Lymphovascular space invasion</b> |              |                       |                    |              |                       |                    |              |
| Yes                                  | 16           |                       |                    |              |                       |                    |              |
| No                                   | 126          | <0.001                | 0.639(0.156-2.616) | 0.533        | <0.001                | 0.764(0.196-2.972) | 0.698        |
| <b>Pelvic-lymph node metastasis</b>  |              |                       |                    |              |                       |                    |              |
| Yes                                  | 29           |                       |                    |              |                       |                    |              |
| No                                   | 113          | <0.001                | 0.275(0.092-0.817) | <b>0.020</b> | <0.001                | 0.275(0.090-0.837) | <b>0.023</b> |
| <b>Recurrence</b>                    |              |                       |                    |              |                       |                    |              |
| Yes                                  | 13           |                       |                    |              |                       |                    |              |
| No                                   | 129          | <0.001                | 0.026(0.007-0.095) | <0.001       | <0.001                | 0.022(0.006-0.081) | <0.001       |
| <b>FASN expression</b>               |              |                       |                    |              |                       |                    |              |
| Low                                  | 85           |                       |                    |              |                       |                    |              |
| High                                 | 57           | <0.001                | 0.115(0.013-0.986) | <b>0.049</b> | <0.001                | 0.114(0.013-0.983) | <b>0.048</b> |

Abbreviations: N: Not application; FIGO: the International Federation of Gynecology and Obstetrics; The bold number inside the table reflected P < 0.05

**Table S2. Univariate and multivariate analyses of factors associated with overall survival and disease-free survival**
