# Supplementary material for: FASN promotes lymph node metastasis in cervical cancer via cholesterol reprogramming and lymphangiogenesis
Source: PubMed Central journal article supplement (PMC9124199; doi:10.1038/s41419-022-04926-2), 2022-05-21
Supplement: 41419_2022_4926_MOESM2_ESM.pdf [file 41419_2022_4926_MOESM2_ESM.pdf]

Fig 2B FASN

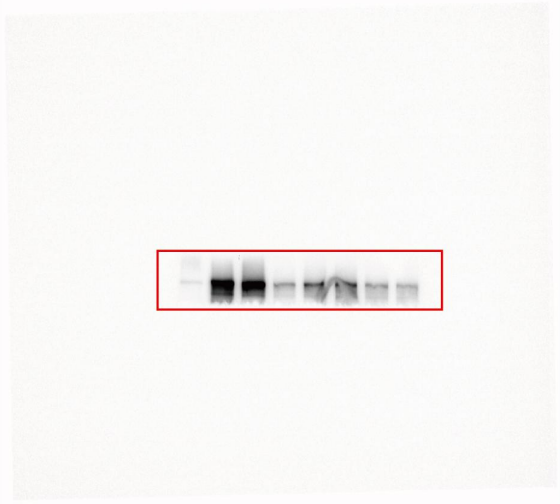

Fig 2B  $\beta$ -actin

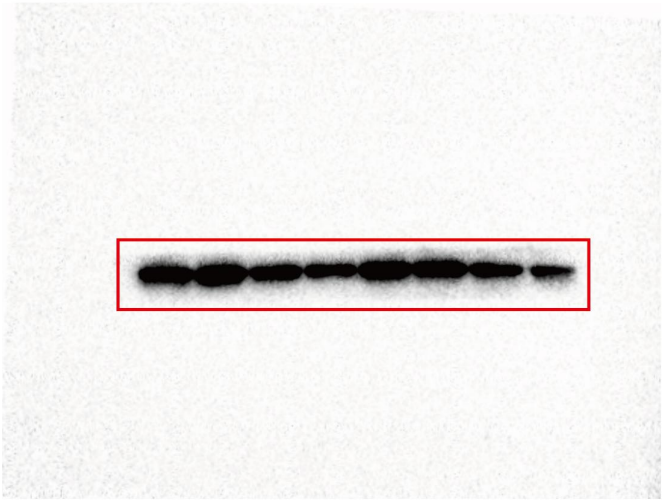

Fig 2D FASN

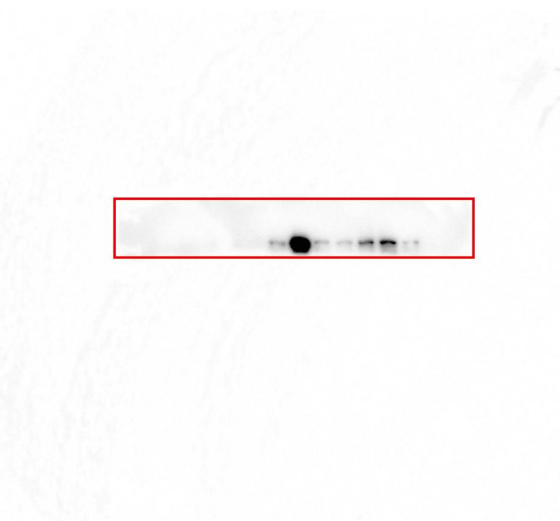

Fig 2D  $\beta$ -actin

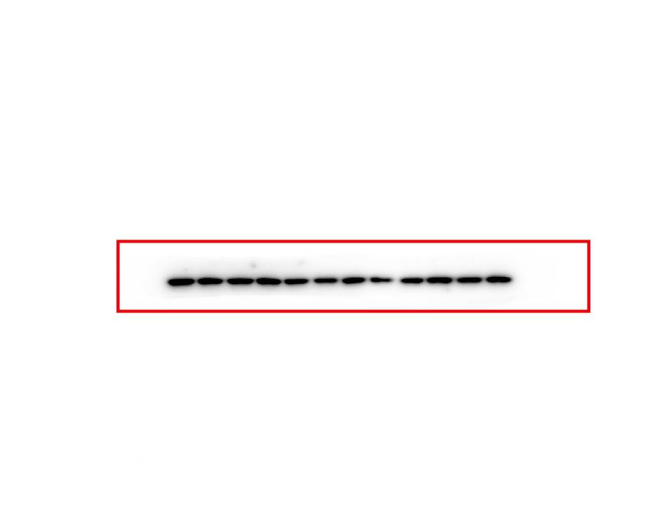

Fig 4J p-Fak HeLa si-FASN#1

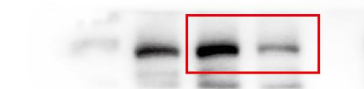

Fig 4J Fak HeLa si-FASN#1

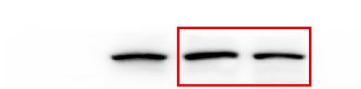

Fig 4J  $\beta$ -actin HeLa si-FASN#1

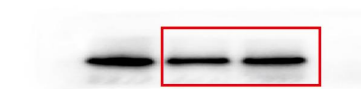

Fig 4J p-Fak HeLa si-FASN#2

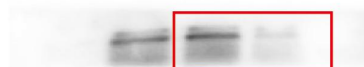

Fig 4J Fak HeLa si-FASN#2

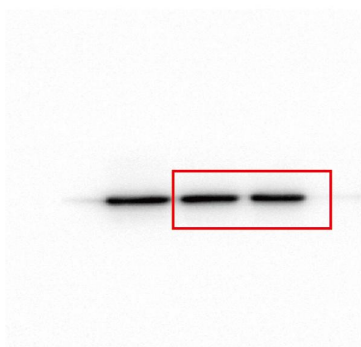

Fig 4J  $\beta$ -actin HeLa si-FASN#2

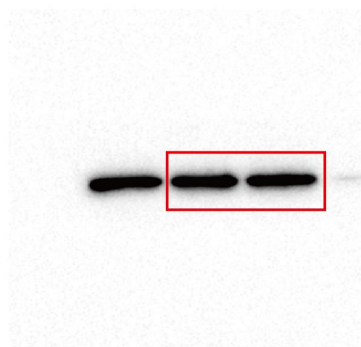

Fig 4J p-Fak CaSki si-FASN#1

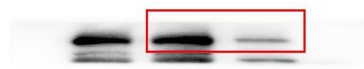

Fig 4J Fak CaSki si-FASN#1

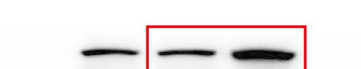

Fig 4J  $\beta$ -actin CaSki si-FASN#1

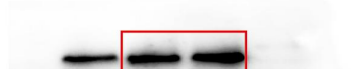

Fig 4J p-Fak CaSki si-FASN#2

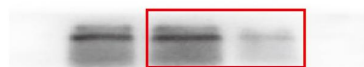

Fig 4J Fak CaSki si-FASN#2

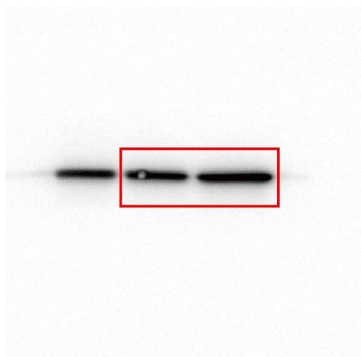

Fig 4J  $\beta$ -actin CaSki si-FASN#2

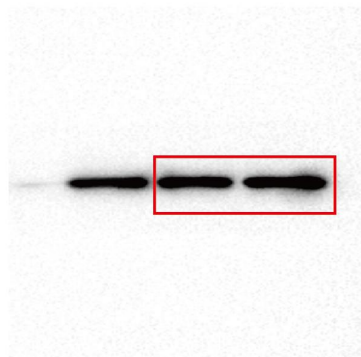

Fig 4K p-Fak C33A

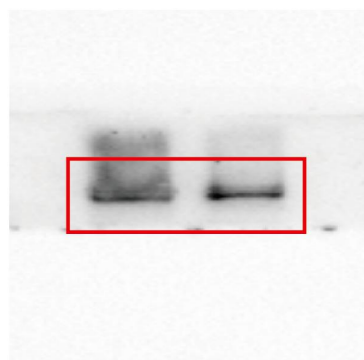

Fig 4K Fak C33A

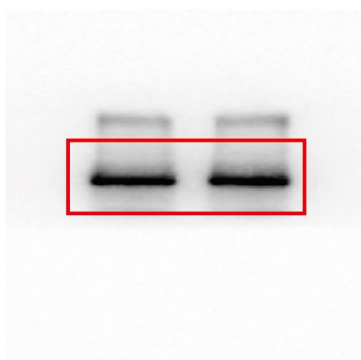

Fig 4K  $\beta$ -actin C33A

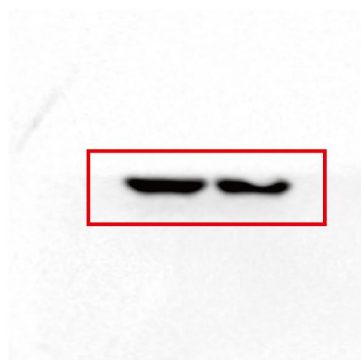

Fig 5A p-Fak

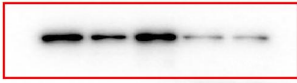

Fig 5A Fak

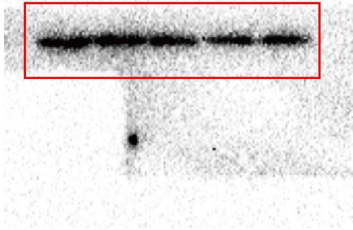

Fig 5A  $\beta$ -actin

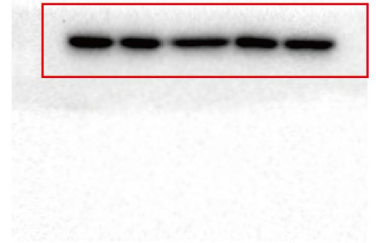

Fig 5B p-Fak

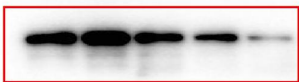

Fig 5B Fak

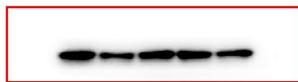

Fig 5B  $\beta$ -actin

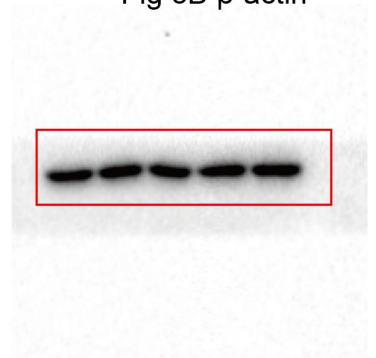

Fig 5C p-c-Src si-FASN#1

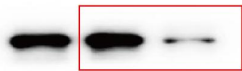

Fig 5C c-Src si-FASN#1

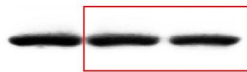

Fig 5C p-Akt si-FASN#1

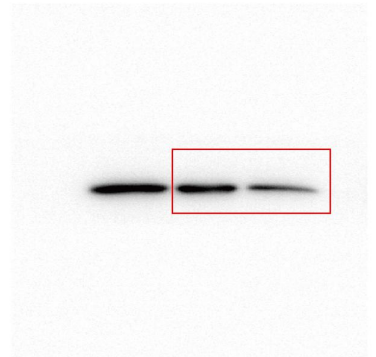

Fig 5C Akt si-FASN#1

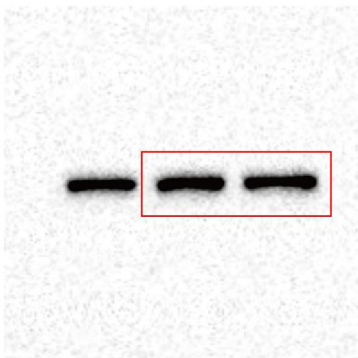

Fig 5C  $\beta$ -actin si-FASN#1

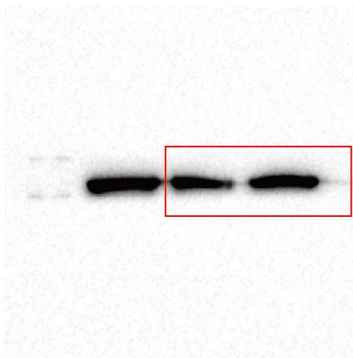

Fig 5C p-c-Src si-FASN#2

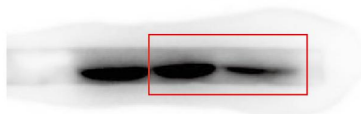

Fig 5C c-Src si-FASN#2

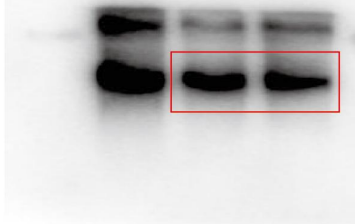

Fig 5C p-Akt si-FASN#2

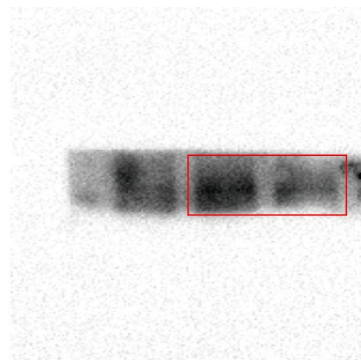

Fig 5C Akt si-FASN#2

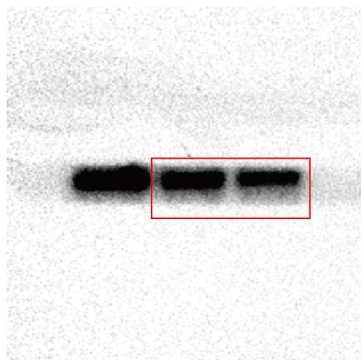

Fig 5C  $\beta$ -actin si-FASN#2

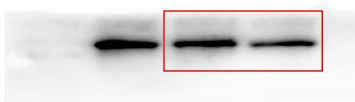

Fig 5D p-c-Src k si-FASN#1

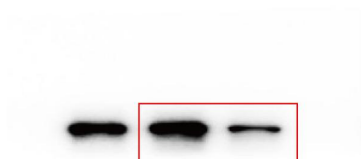

Fig 5D c-Src si-FASN#1

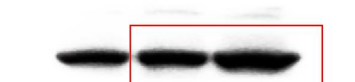

Fig 5D p-Akt si-FASN#1

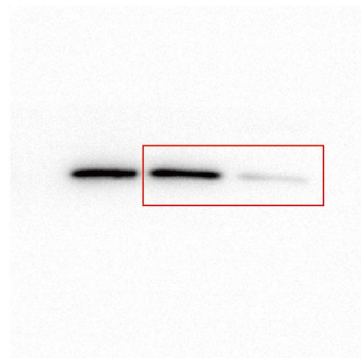

Fig 5D Akt si-FASN#1

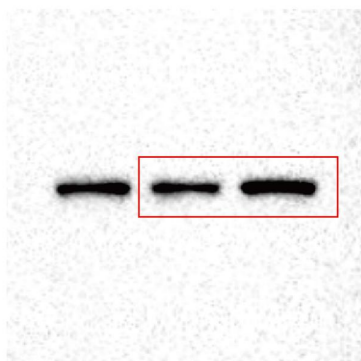

Fig 5D  $\beta$ -actin si-FASN#1

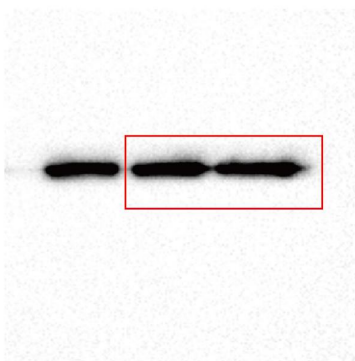

Fig 5D p-c-Src si-FASN#2

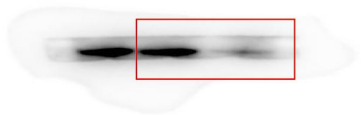

Fig 5D c-Src si-FASN#2

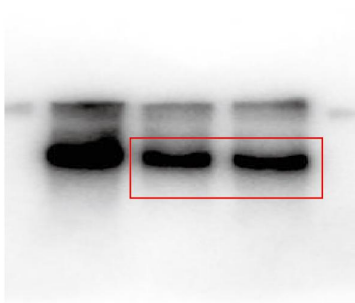

Fig 5D p-Akt si-FASN#2

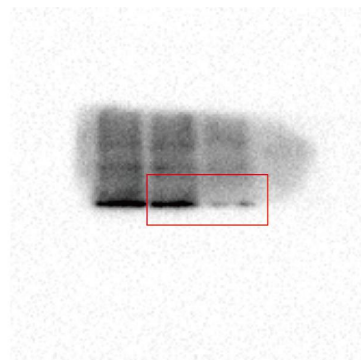

Fig 5D Akt si-FASN#2

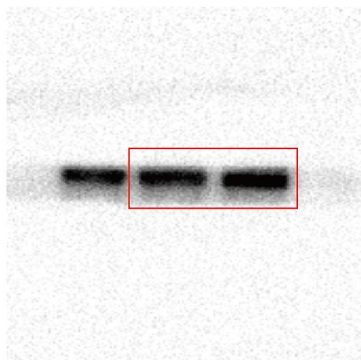

Fig 5D  $\beta$ -actin si-FASN#2

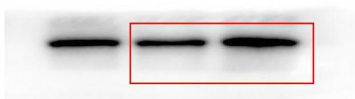

Fig 5E p-c-Src

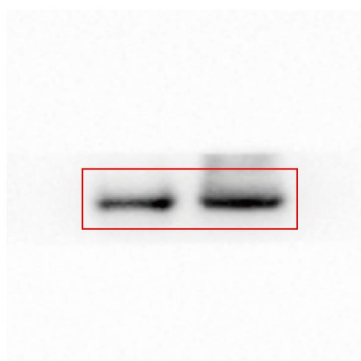

Fig 5E c-Src

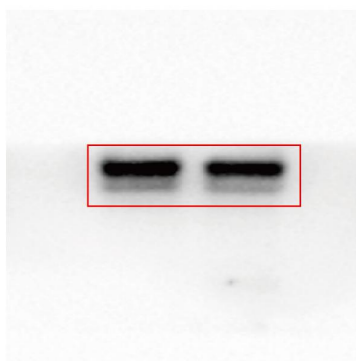

Fig 5E p-Akt

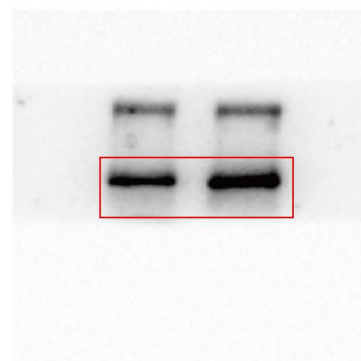

Fig 5E Akt

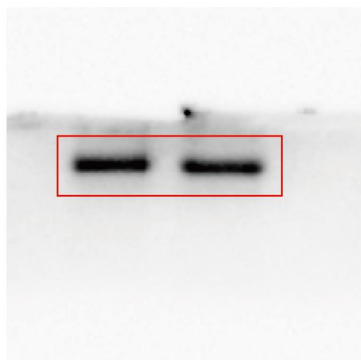

Fig 5E  $\beta$ -actin

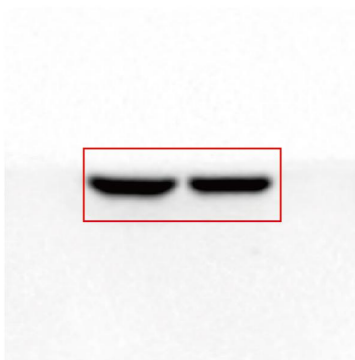

Fig 5F p-Fak

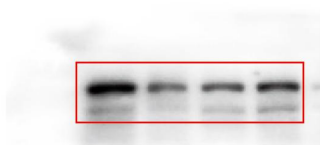

Fig 5F Fak

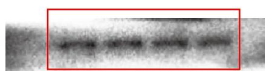

Fig 5F p-Akt

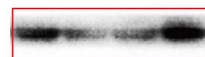

Fig 5F Akt

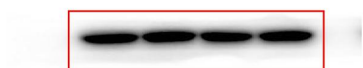

Fig 5F  $\beta$ -actin

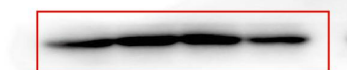

Fig 5G p-Fak

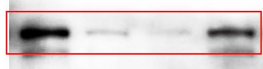

Fig 5G Fak

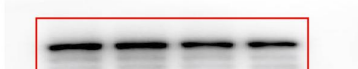

Fig 5G p-Akt

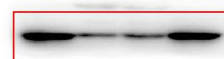

Fig 5G Akt

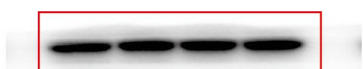

Fig 5G  $\beta$ -actin

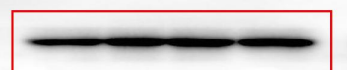



Fig 5H p-Fak

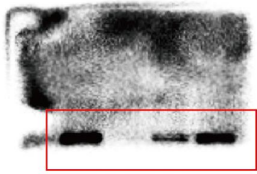

Fig 5H Fak

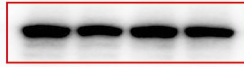

Fig 5H p-c-Src

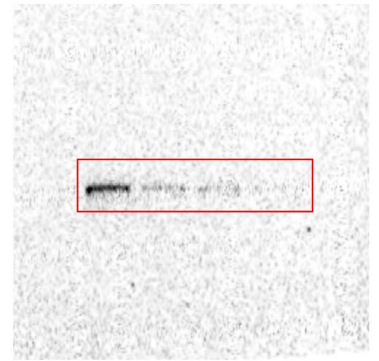

Fig 5H c-Src

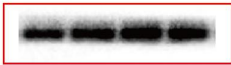

Fig 5H  $\beta$ -actin

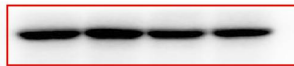

Fig 5I p-Fak

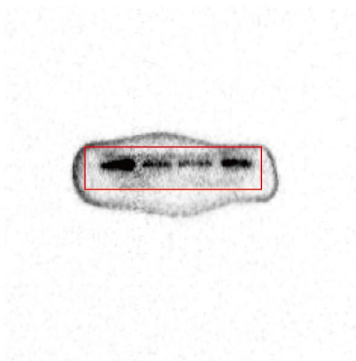

Fig 5I Fak

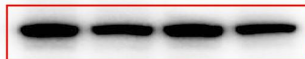

Fig 5I p-c-Src

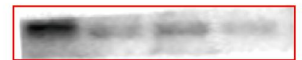

Fig 5I c-Src

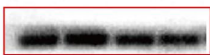

Fig 5I  $\beta$ -actin

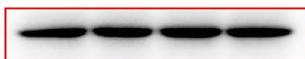

Fig 5J c-Src HeLa

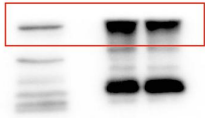

Fig 5J FASN HeLa

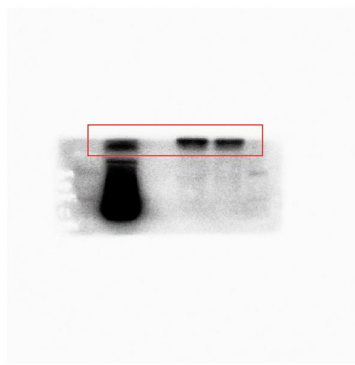

Fig 5J c-Src CaSki

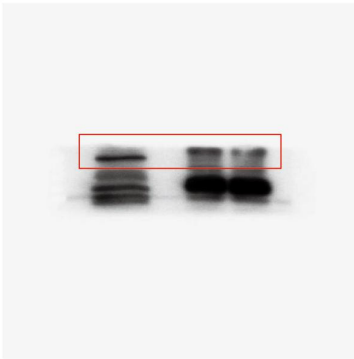

Fig 5J FASN Caski

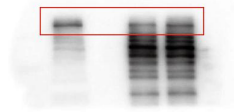

Note: For the western blot gel pictures in Fig 4J, 5C, 5D, the HeLa or CaSki cells were treated with nothing, scrambled-siRNA, FASN-siRNA(Left to right). And only the scrambled-siRNA and FASN-siRNA were cropped to show in the main figures.
